# Supplementary material for: An expedient approach to highly enantioenriched cyclic nitrones mediated by robust and recoverable C3-symmetric cinchonine-squaramide catalysts
Source: Royal Society of Chemistry journal article supplement (doi:10.1039/c2ra21162a), 2012-01-01
Supplement: c2ra21162a.pdf [file c2ra21162a.pdf]

## Supporting information

# An Expedient Approach to Highly Enantioenriched Cyclic Nitrones Mediated by Robust and Recoverable C<sub>3</sub>-Symmetric Cinchonine-Squaramide Catalysts

*Xin Han,<sup>a</sup> Xiang-Fei Wu,<sup>a</sup> Chang Min,<sup>a</sup> Hai-Bing Zhou,<sup>a,b</sup> Chune Dong<sup>\*a,b</sup>*

<sup>a</sup>Laboratory of Combinatorial Biosynthesis and Drug Discovery, Ministry of Education, Wuhan University School of Pharmaceutical Sciences, Wuhan, 430071,

<sup>b</sup> Key Laboratory of Organofluorine Chemistry, Shanghai Institute of Organic Chemistry, Chinese Academy of Sciences, Shanghai 200032, China

[cdong@whu.edu.cn](mailto:cdong@whu.edu.cn)

## Content

|                                  |            |
|----------------------------------|------------|
| <b>NMR Spectra of Products 5</b> | <b>S2</b>  |
| <b>HPLC of 5</b>                 | <b>S14</b> |

## NMR spectra of products

### 5a

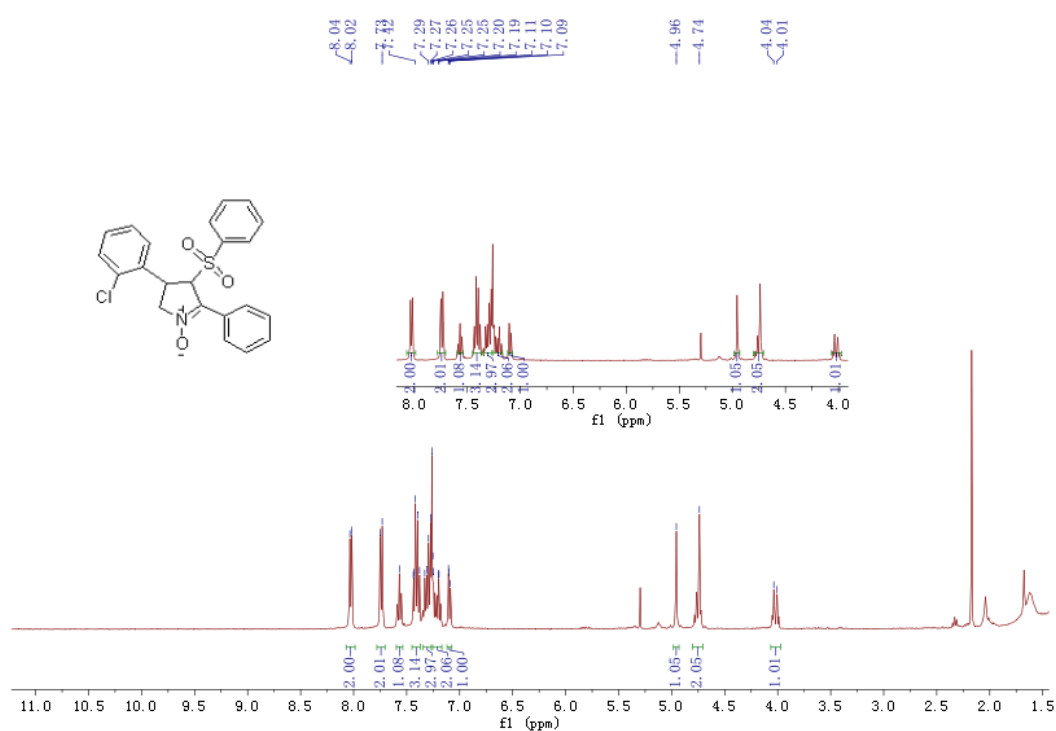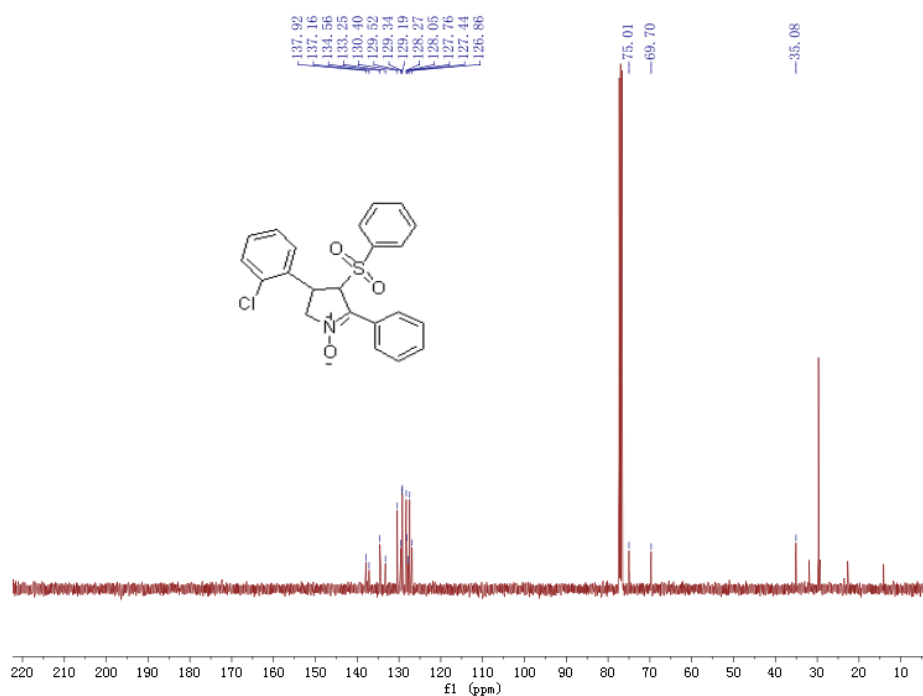

## 5b

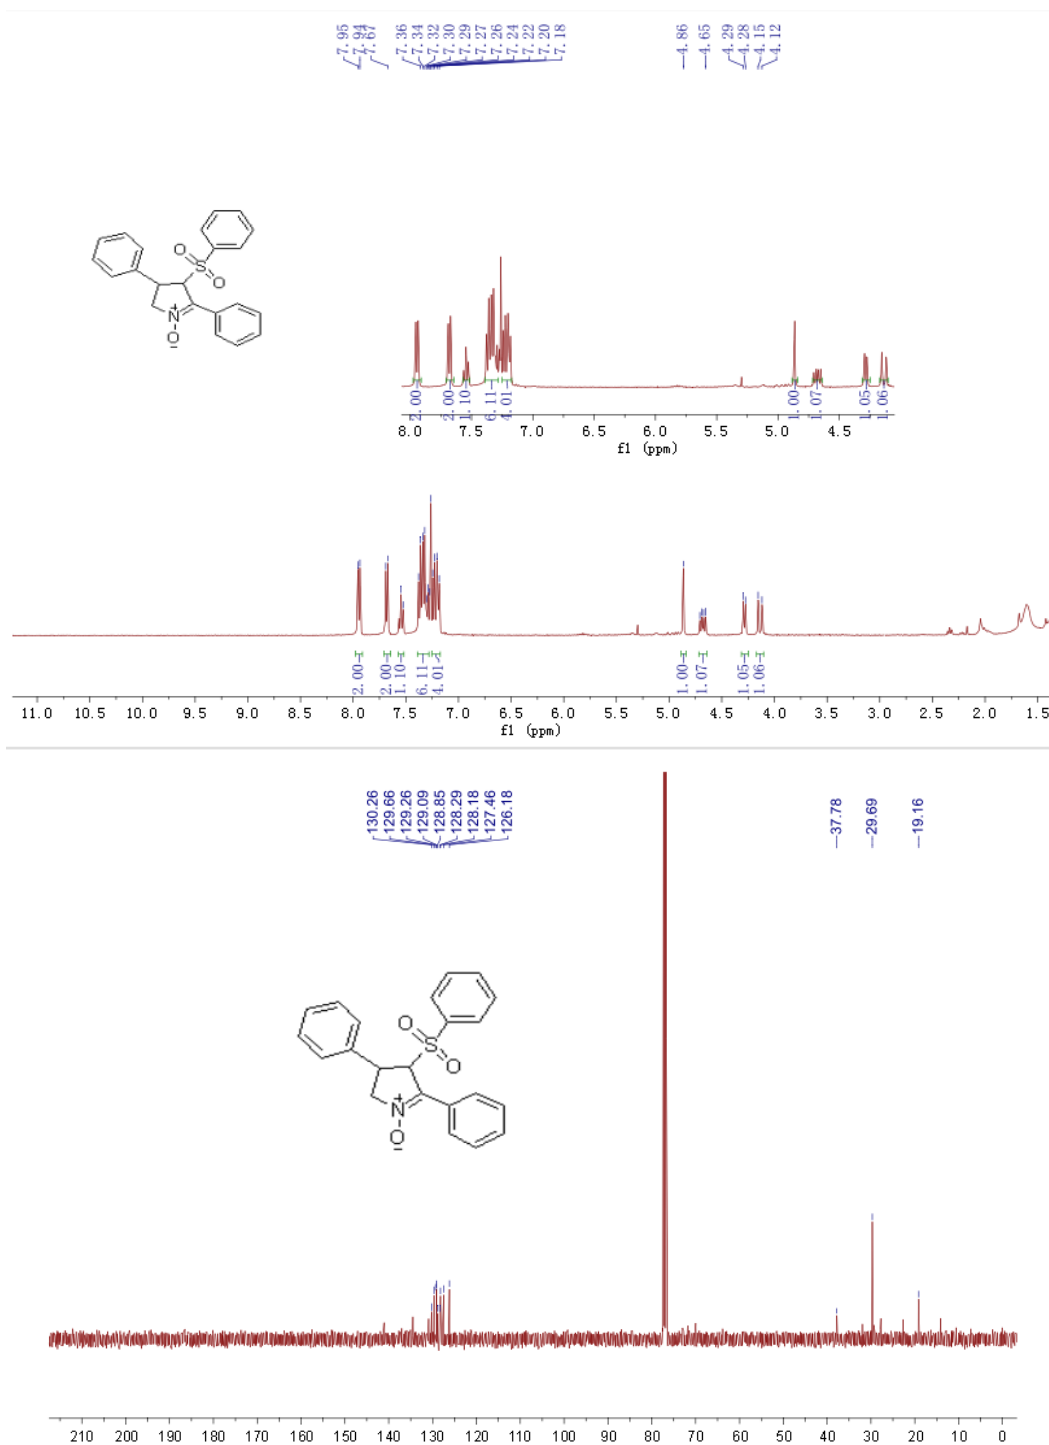

## 5c

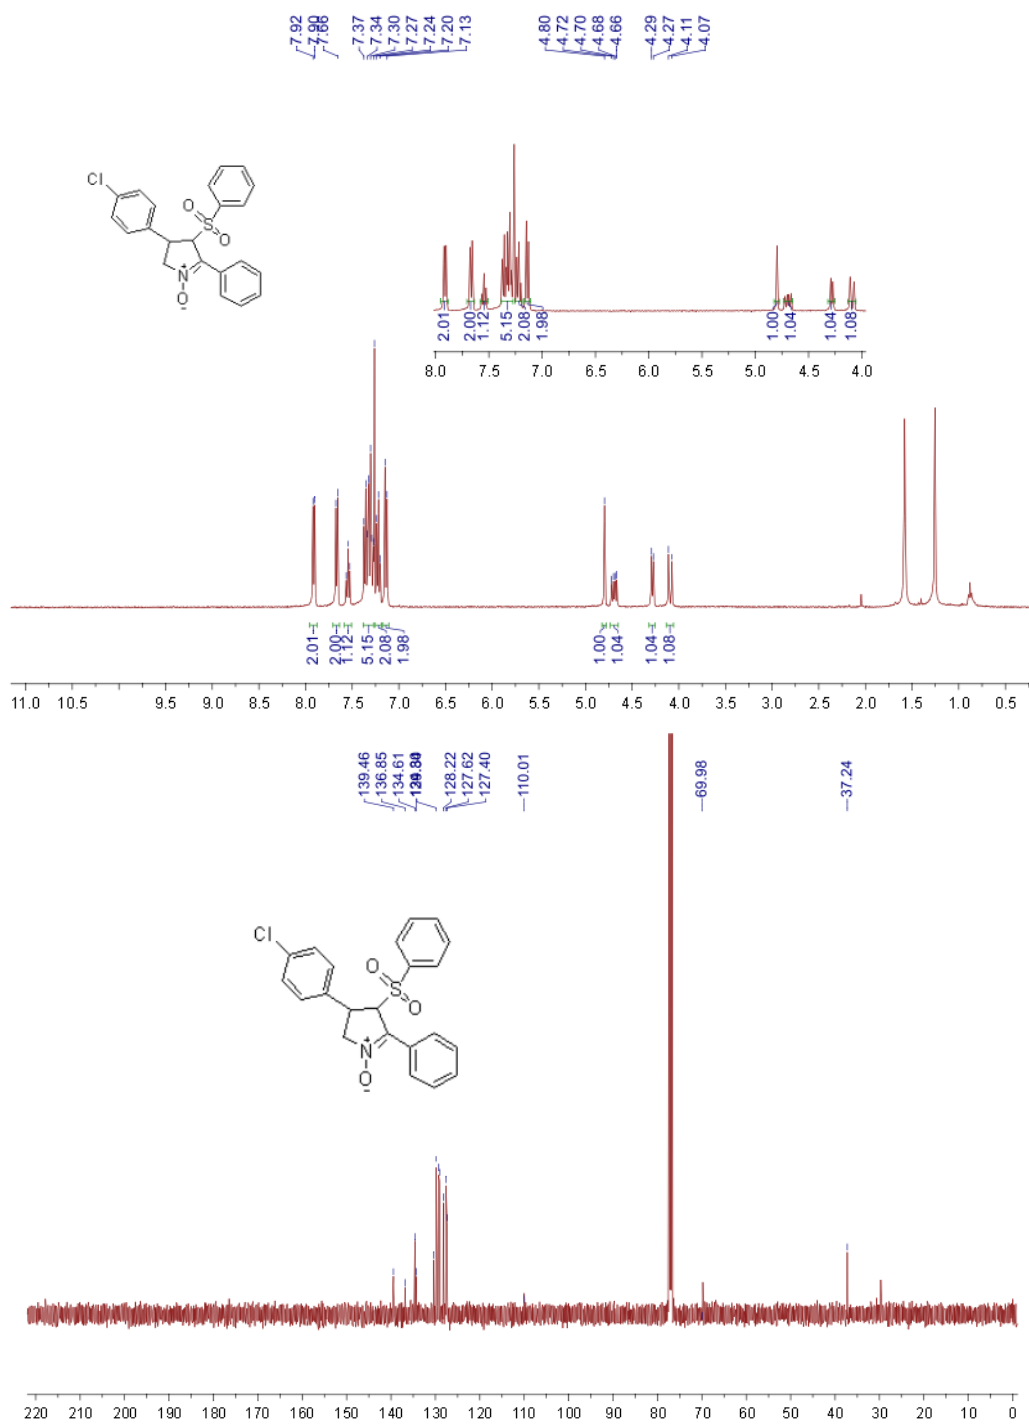

## 5d

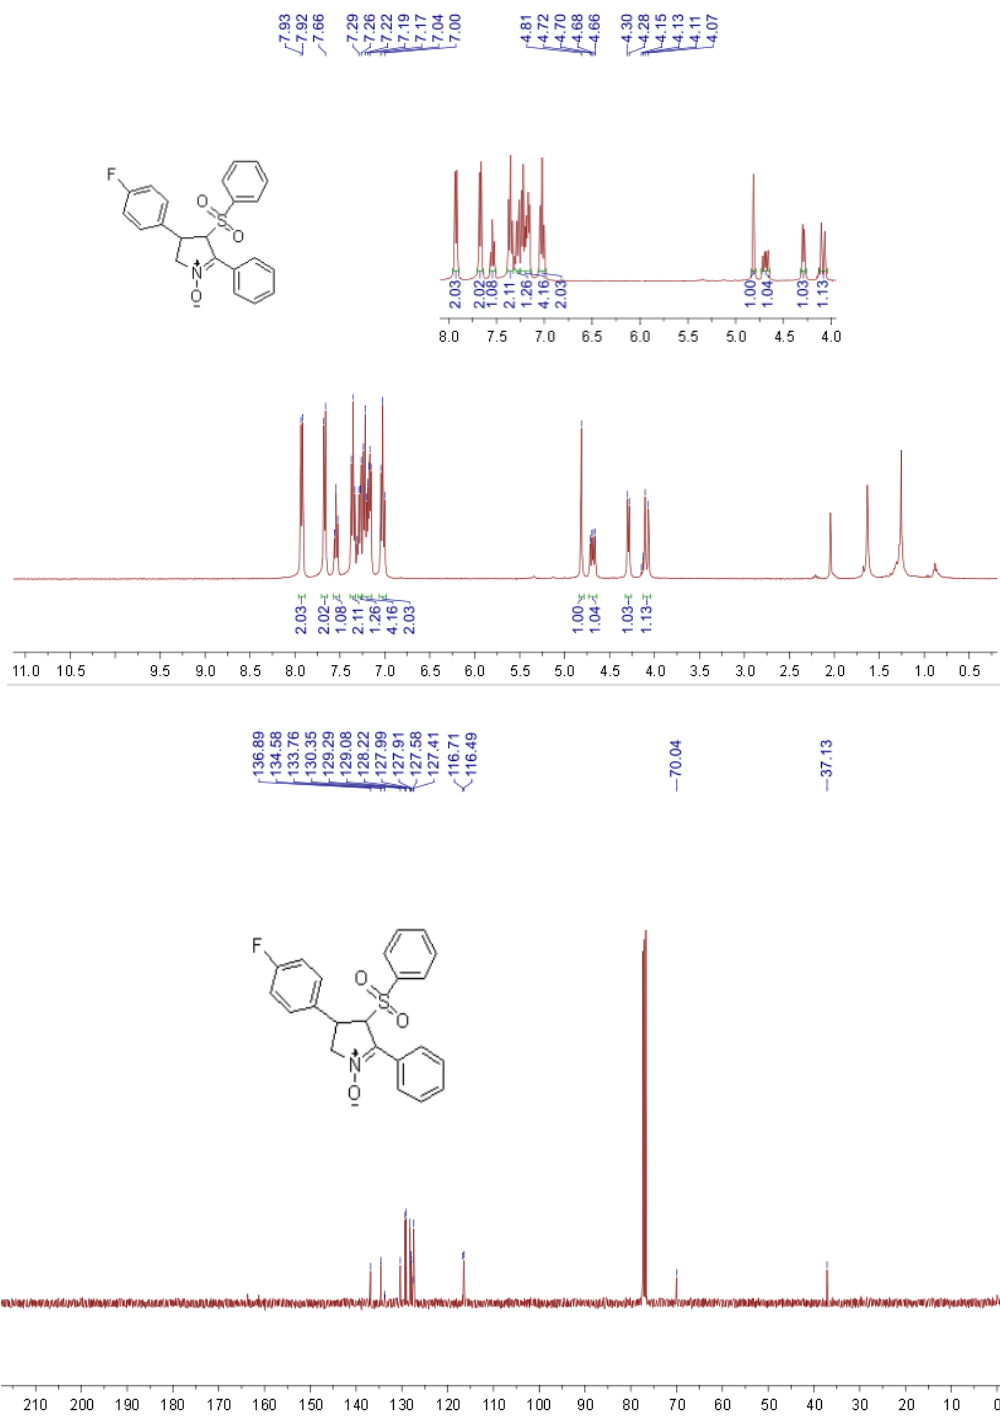

5e

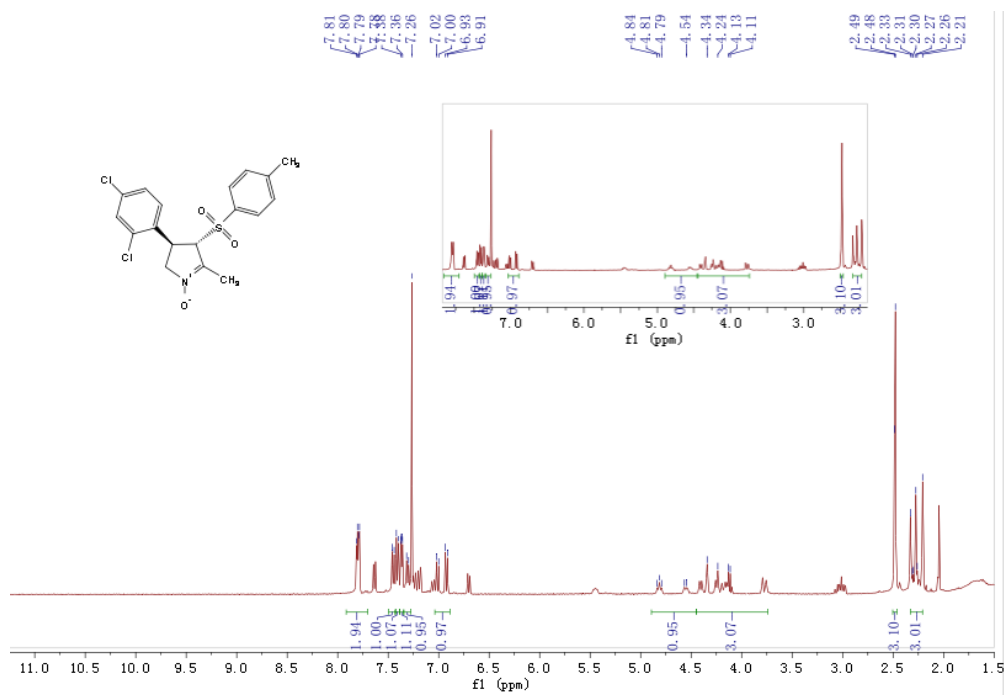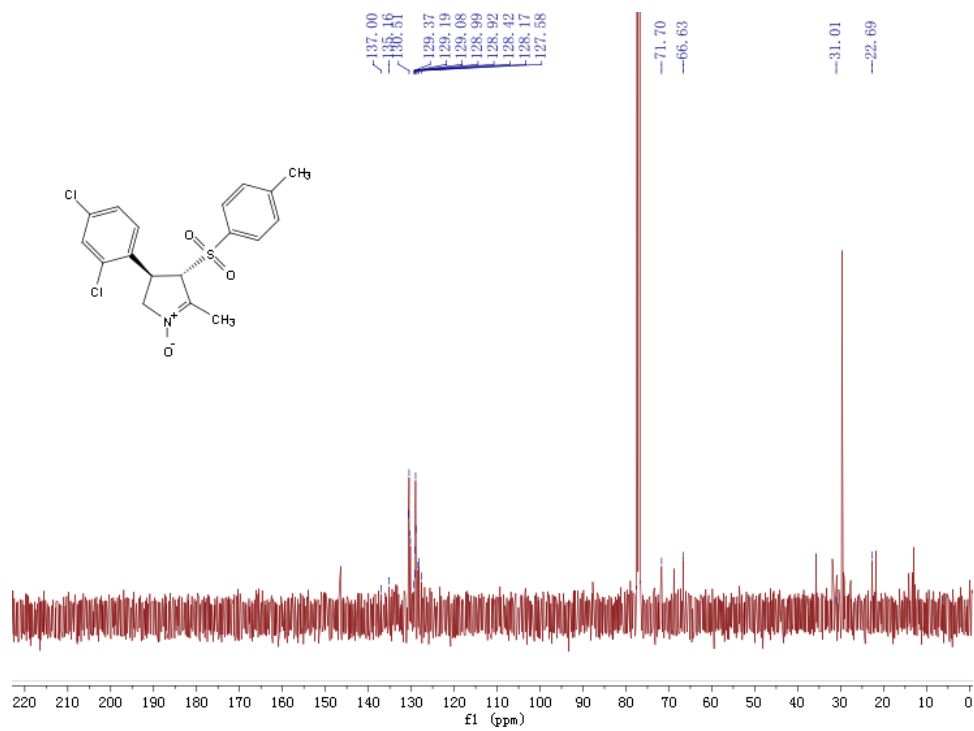

5f

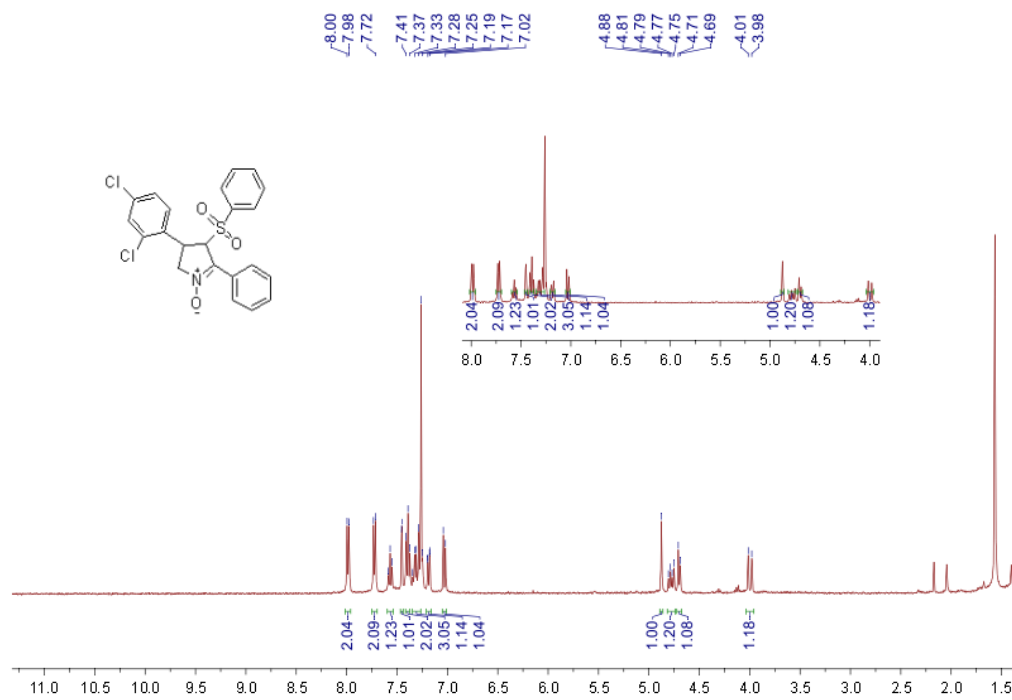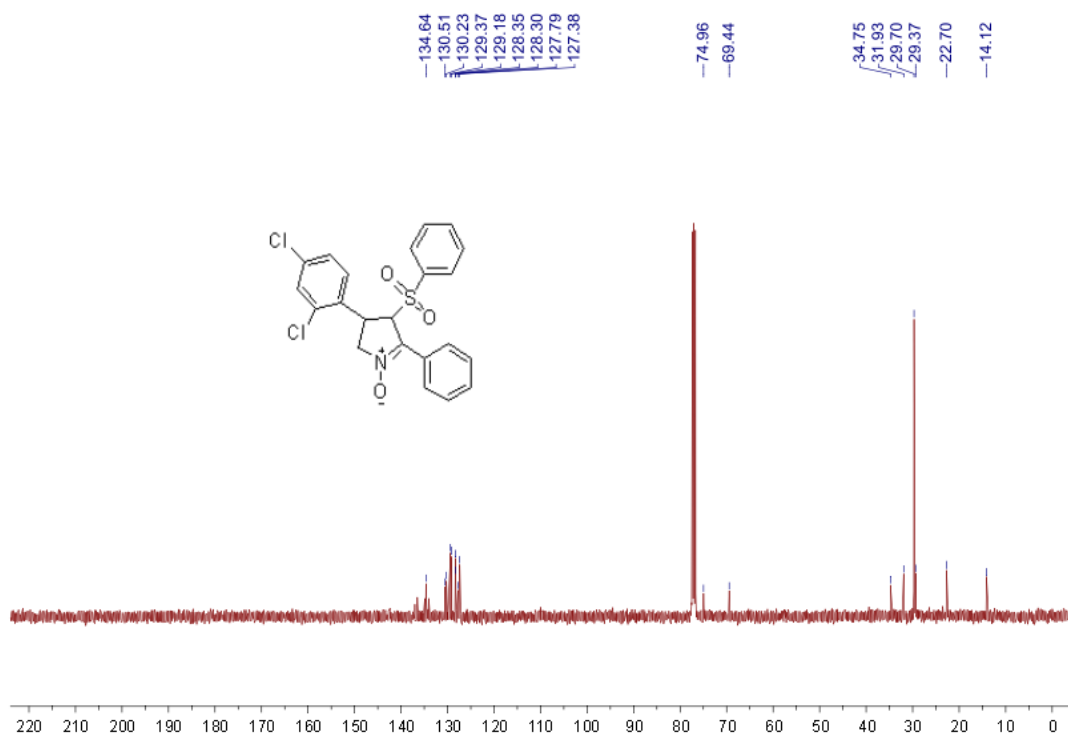

5h

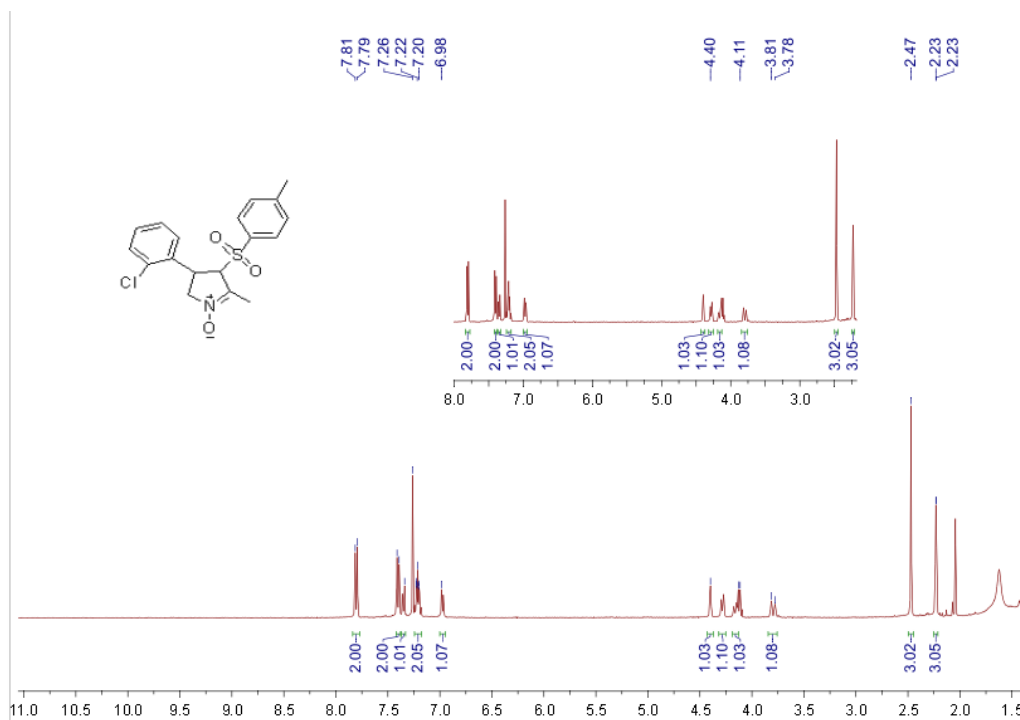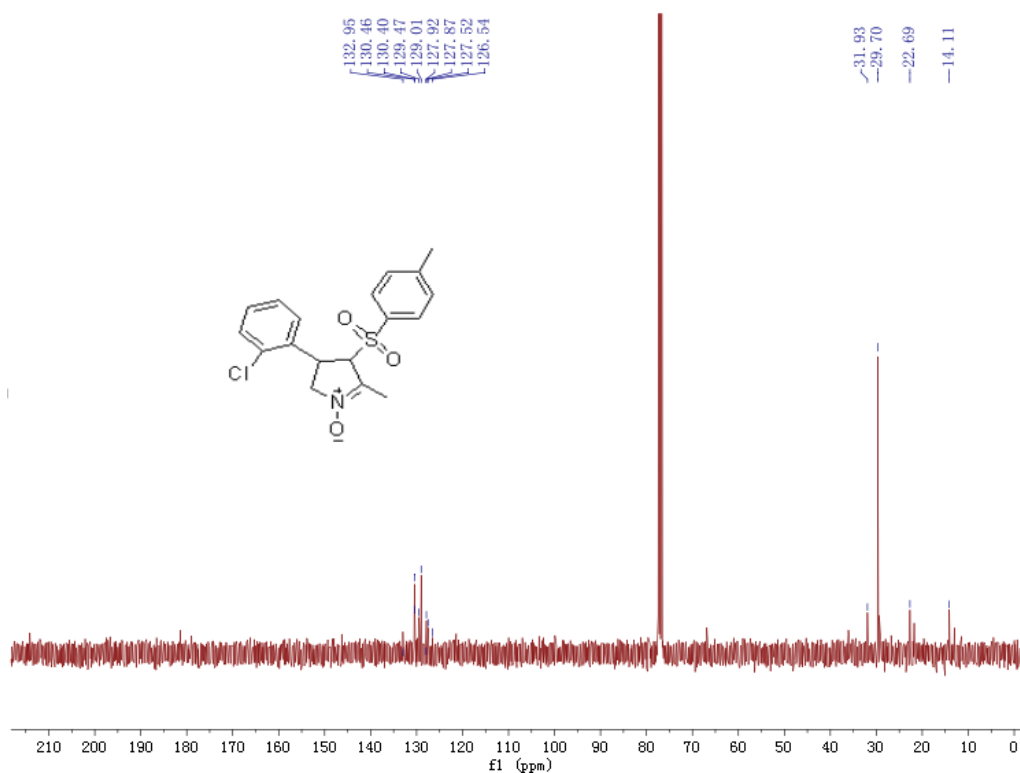



5i

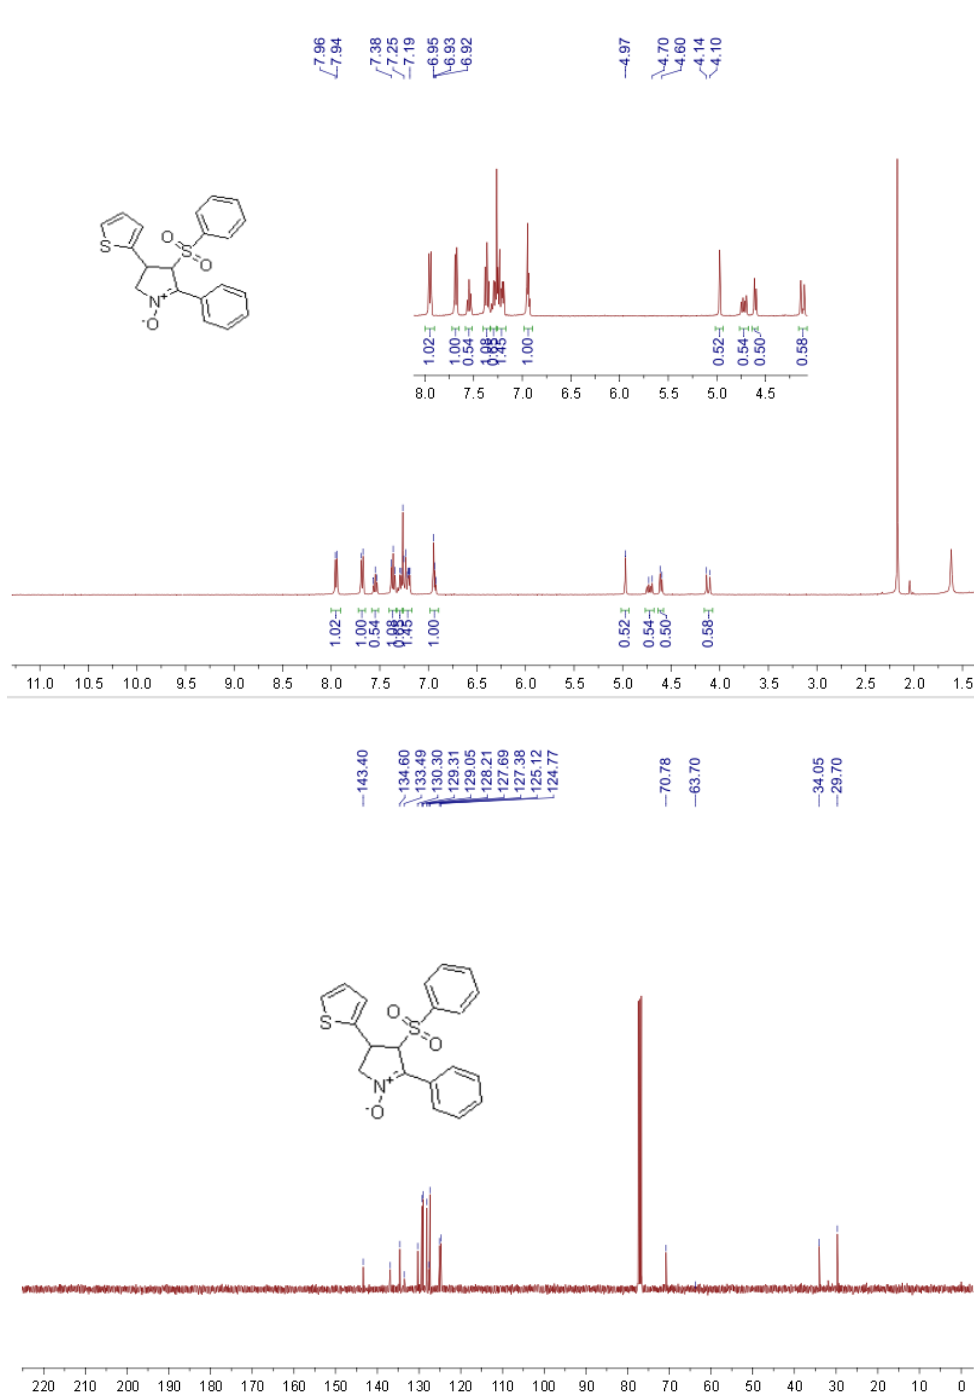

5j

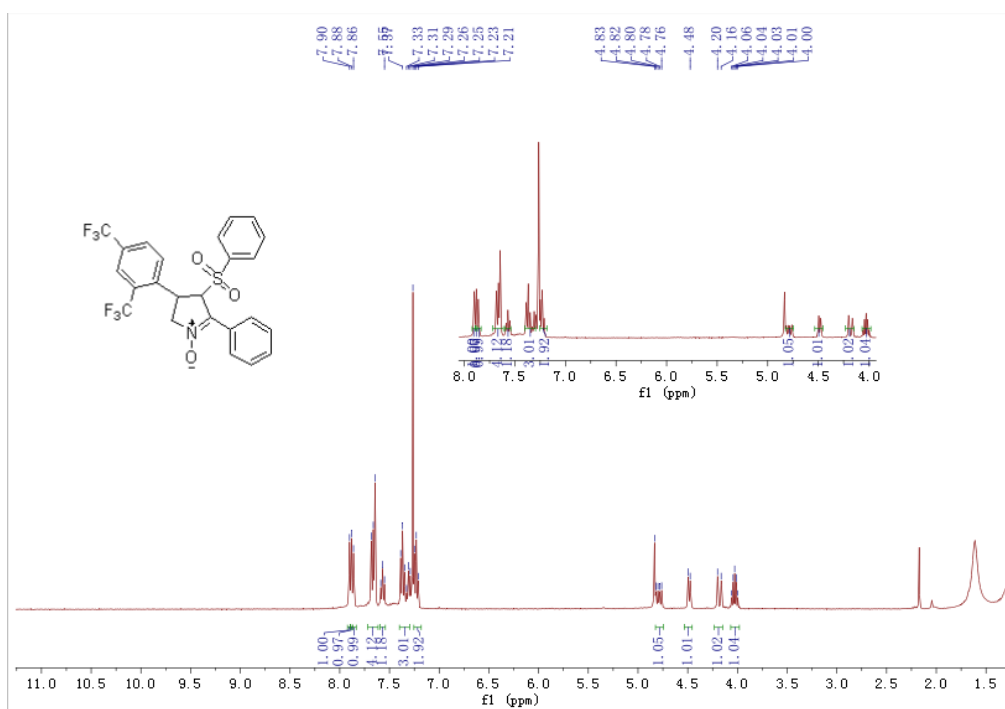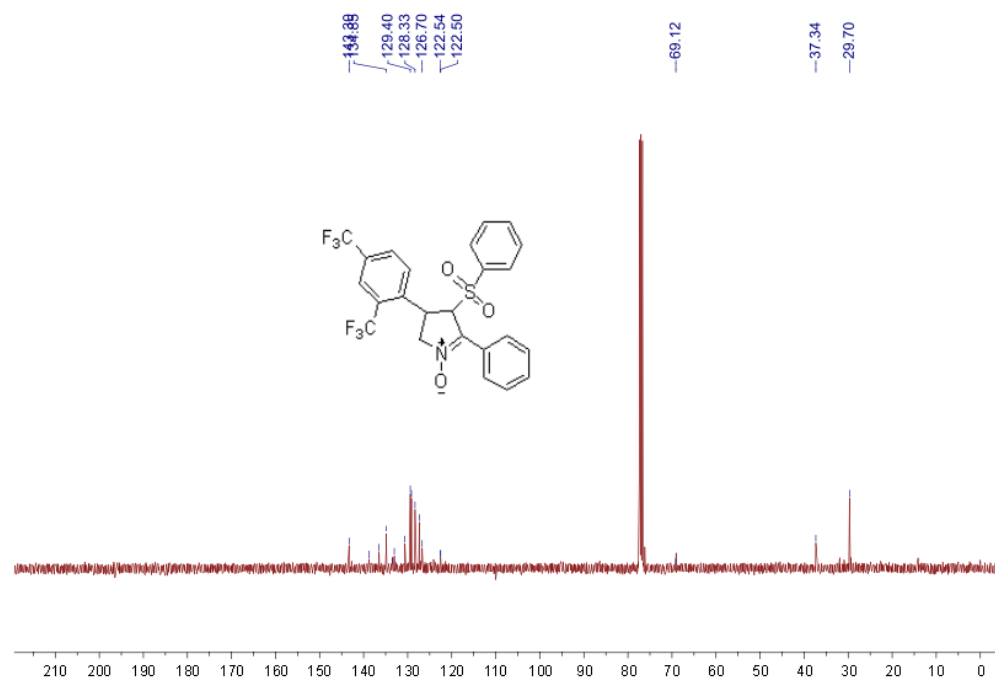

5k

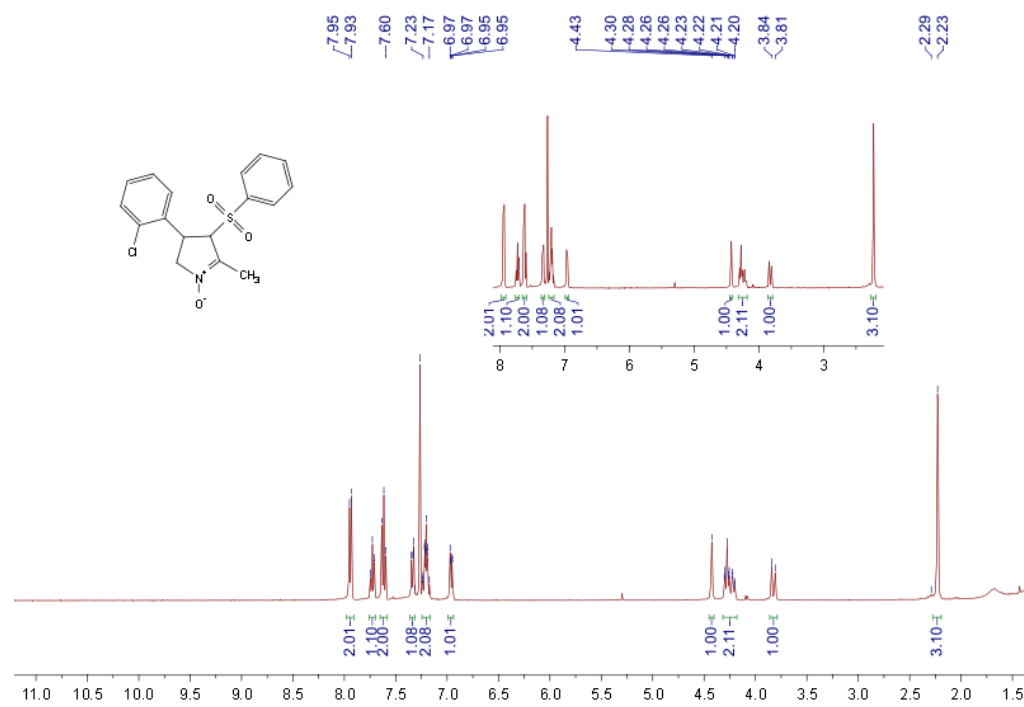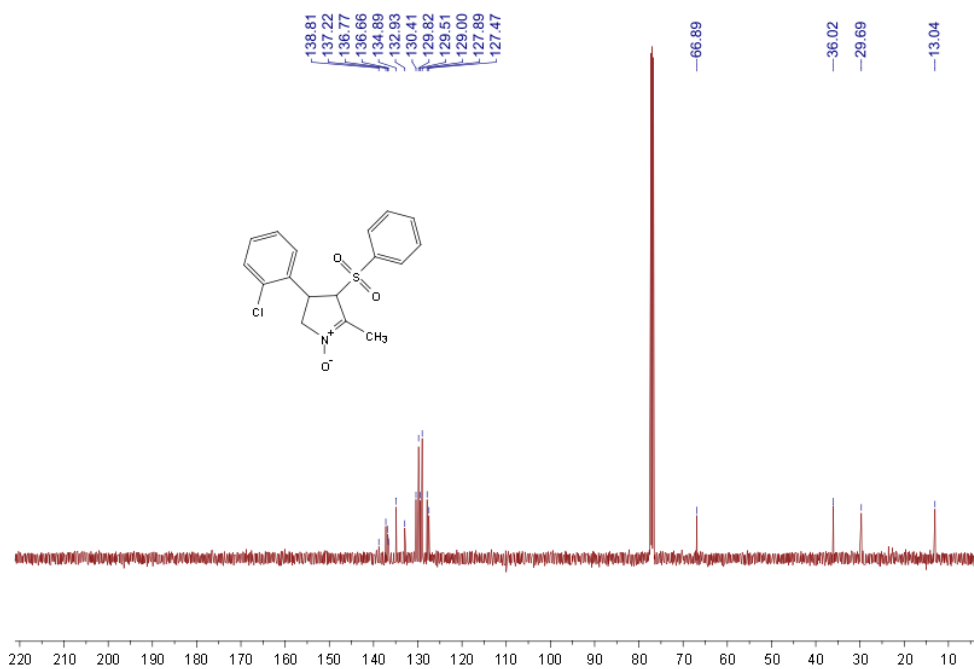

51

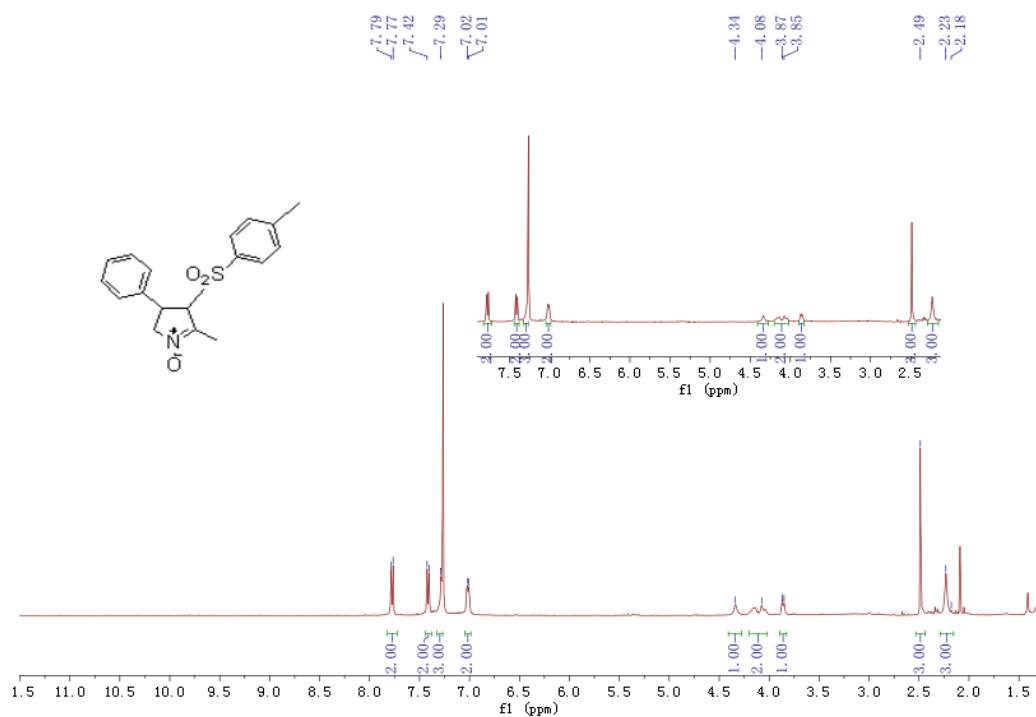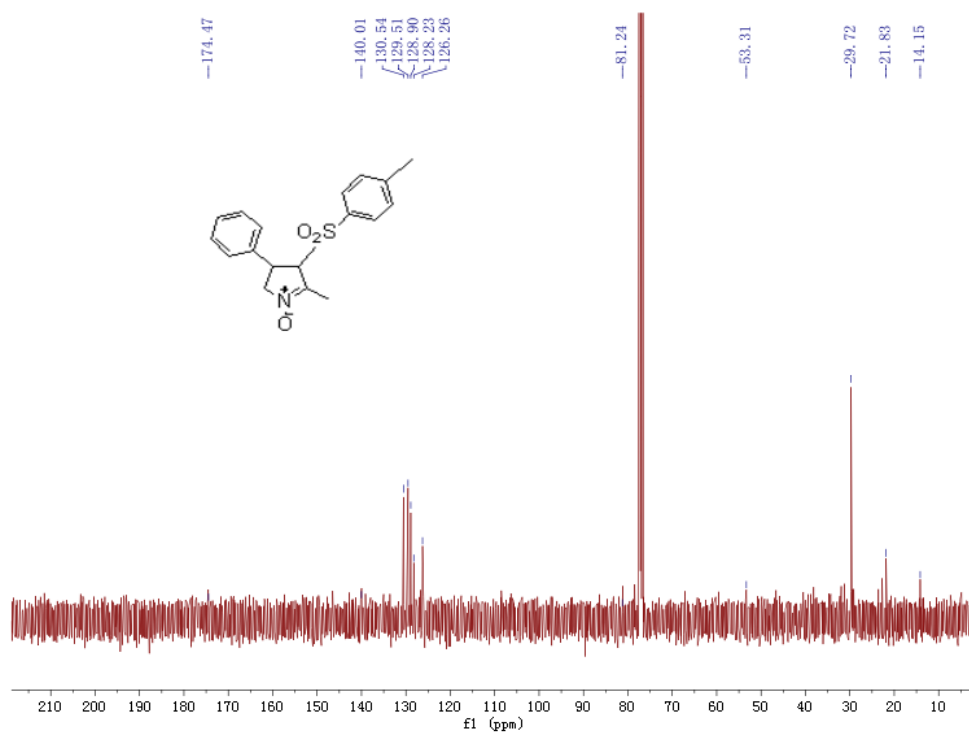

5m

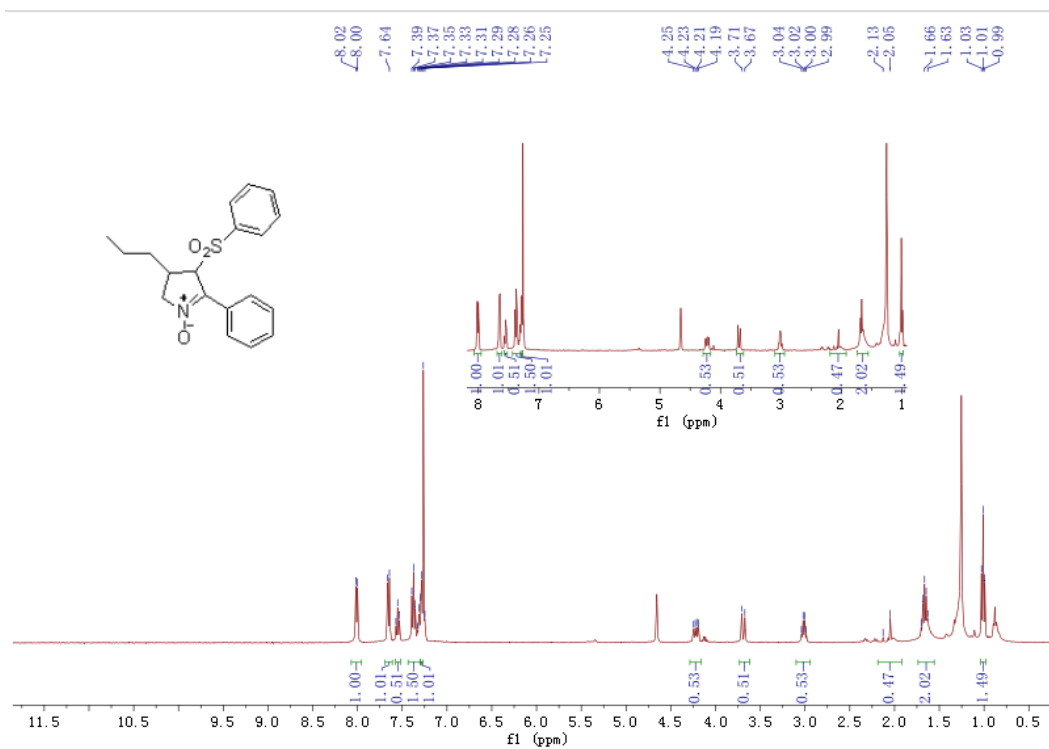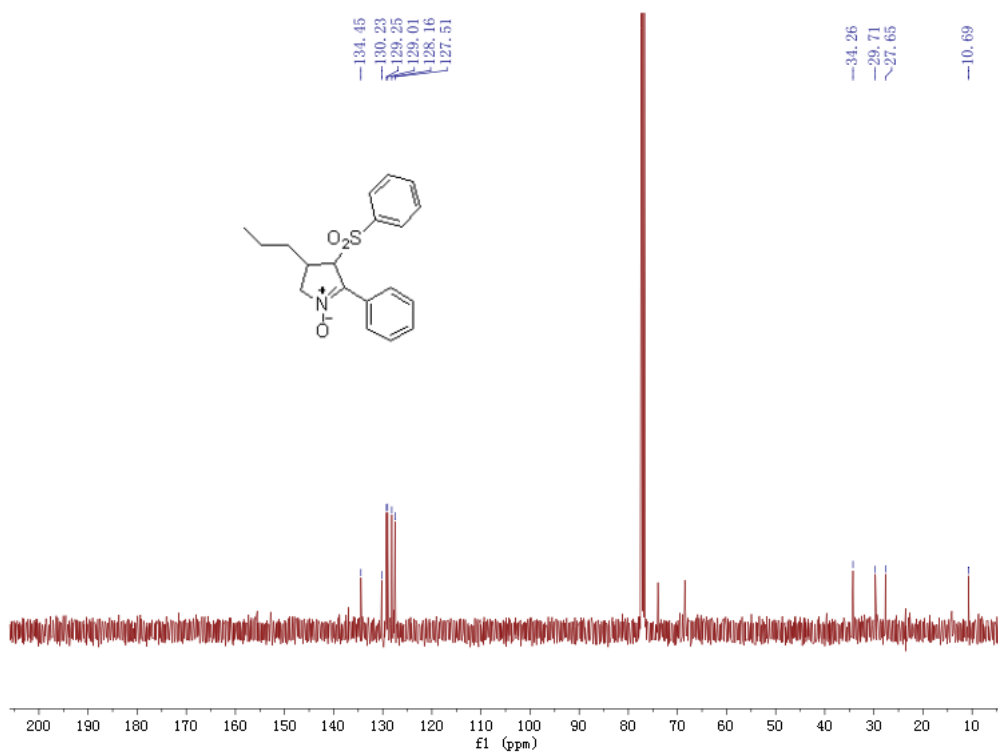

## HPLC spectra of products

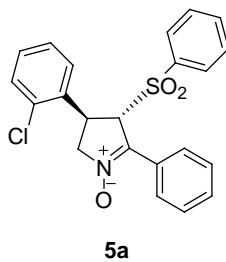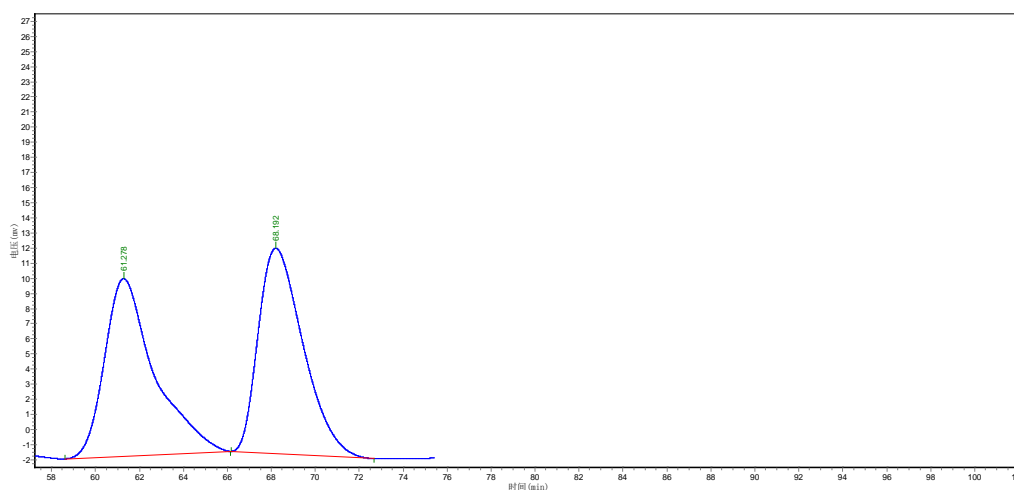

| Peak | Ret Time(min) | Height(mAU) | Area(Mau *s) | Area (%) |
|------|---------------|-------------|--------------|----------|
| 1    | 61.278        | 11747.470   | 1847255.750  | 49.2102  |
| 2    | 68.192        | 13587.118   | 1924237.375  | 50.7898  |

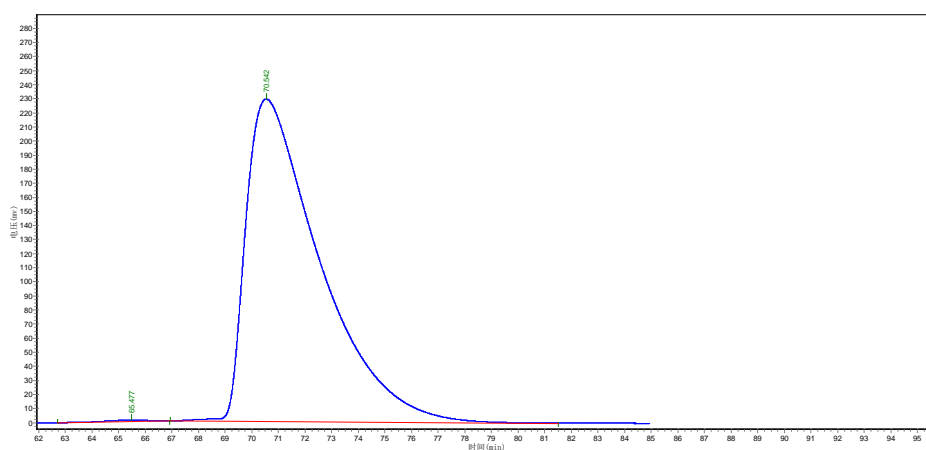

| Peak | Ret Time(min) | Height(mAU) | Area(Mau *s) | Area (%) |
|------|---------------|-------------|--------------|----------|
| 1    | 65.477        | 610.950     | 66869.750    | 0.1486   |
| 2    | 70.542        | 230237.516  | 44935288.000 | 99.8514  |

### 5a catalyzed by C<sub>3</sub>-symmetric cinchonidine-squaramide 1d

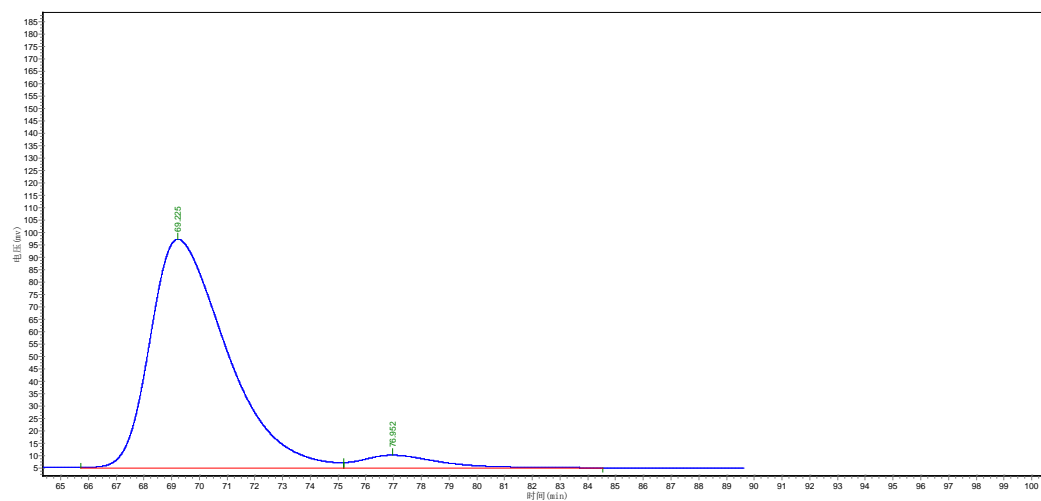

| 峰号 | 峰名     | 保留时间      | 峰高           | 峰面积     | 含量 |
|----|--------|-----------|--------------|---------|----|
| 1  | 69.225 | 92064.453 | 17567602.000 | 97.3012 |    |
| 2  | 76.952 | 3366.101  | 487257.969   | 2.6988  |    |

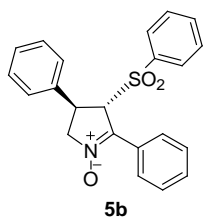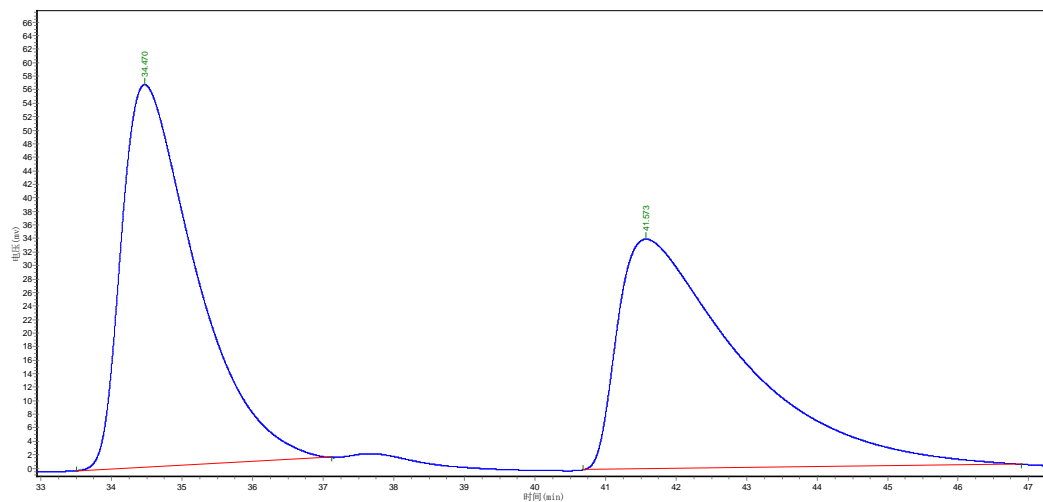

| Peak | Ret Time(min) | Height(mAU) | Area(Mau *s) | Area (%) |
|------|---------------|-------------|--------------|----------|
| 1    | 34.470        | 56595.398   | 4157207.000  | 50.2320  |
| 2    | 41.573        | 34013.254   | 4118813.750  | 49.7680  |

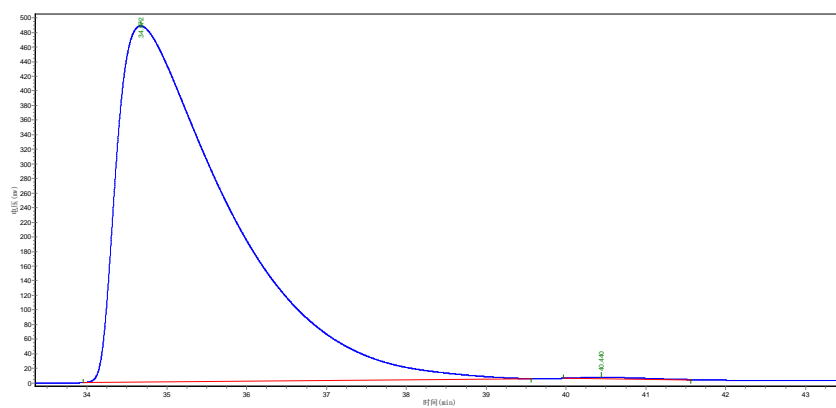

| Peak | Ret Time(min) | Height(mAU) | Area(Mau *s) | Area (%) |
|------|---------------|-------------|--------------|----------|
| 1    | 34.672        | 487907.188  | 47251792.000 | 99.7521  |
| 2    | 40.440        | 1783.506    | 117410.383   | 0.2479   |



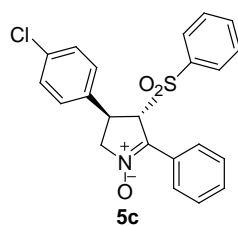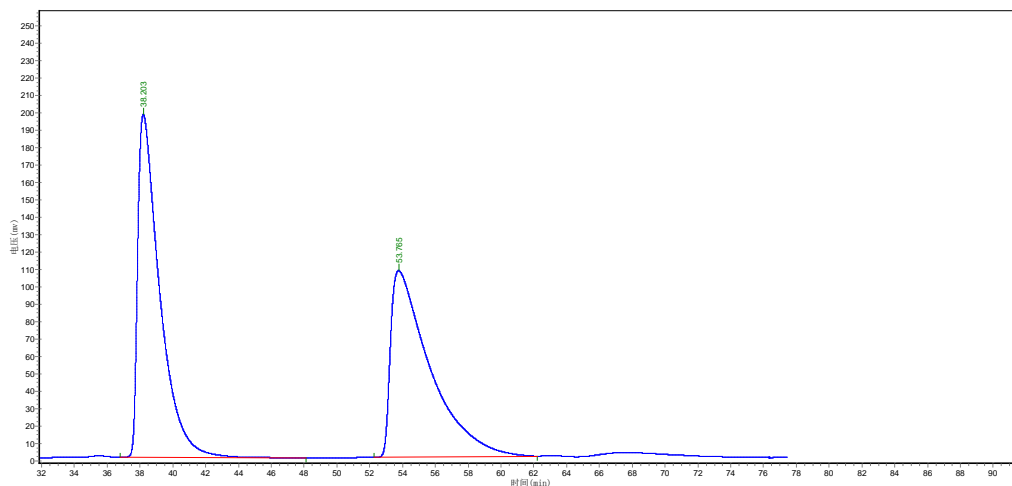

| Peak | Ret Time(min) | Height(mAU) | Area(Mau *s) | Area (%) |
|------|---------------|-------------|--------------|----------|
| 1    | 38.203        | 197158.281  | 18392066.000 | 50.7171  |
| 2    | 53.765        | 107219.813  | 17871980.000 | 49.2829  |

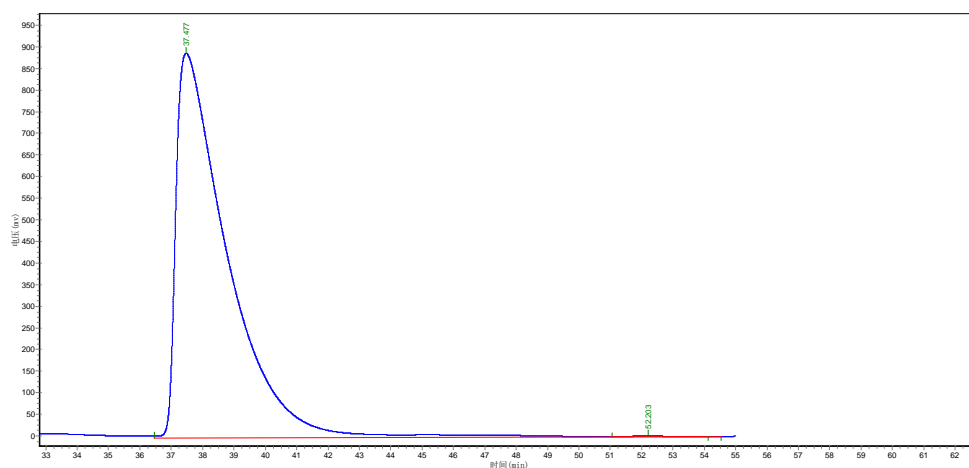

| Peak | Ret Time(min) | Height(mAU) | Area(Mau *s)  | Area (%) |
|------|---------------|-------------|---------------|----------|
| 1    | 37.477        | 890029.313  | 101603544.000 | 99.8910  |
| 2    | 52.203        | 1449.909    | 110870.250    | 0.1090   |

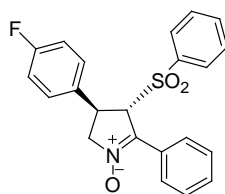

5d

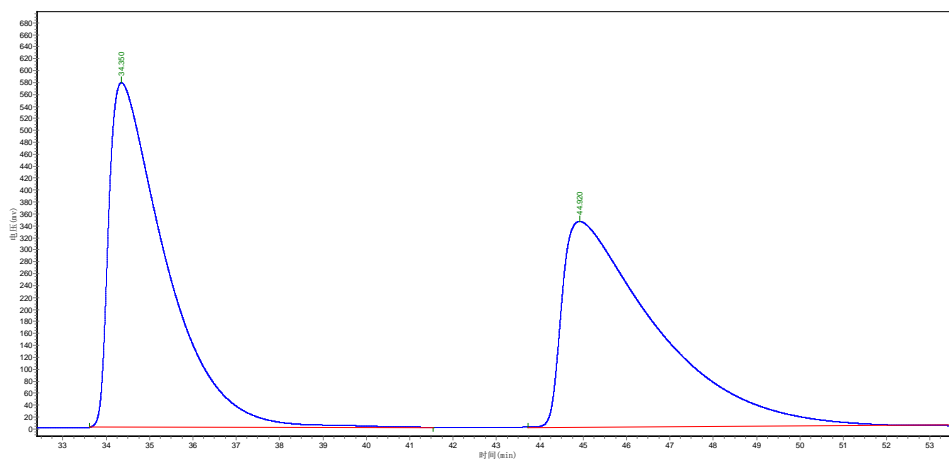

| Peak | Ret Time(min) | Height(mAU) | Area(Mau *s) | Area (%) |
|------|---------------|-------------|--------------|----------|
| 1    | 34.350        | 576731.813  | 52276004.000 | 50.4171  |
| 2    | 44.920        | 343751.625  | 51411068.000 | 49.5829  |

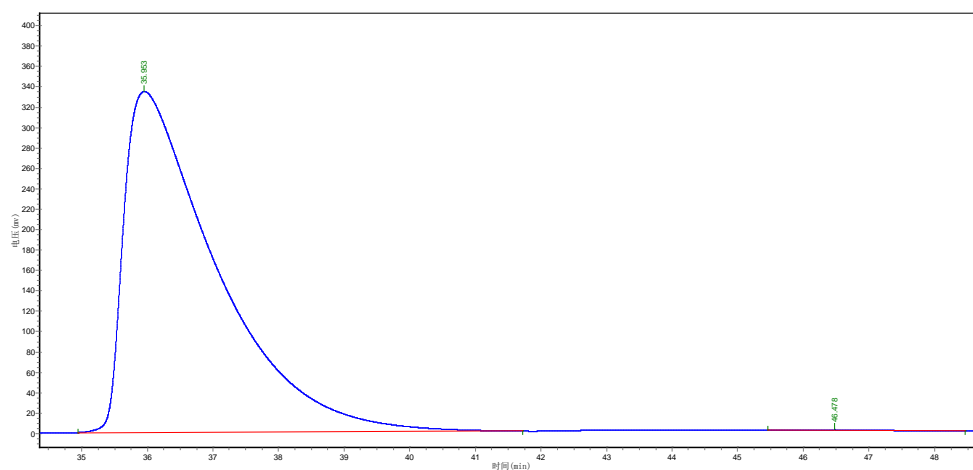

| Peak | Ret Time(min) | Height(mAU) | Area(Mau *s) | Area (%) |
|------|---------------|-------------|--------------|----------|
| 1    | 35.953        | 334452.969  | 32731796.000 | 99.8346  |
| 2    | 46.478        | 658.059     | 54216.836    | 0.1654   |

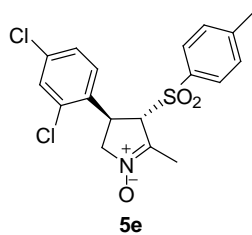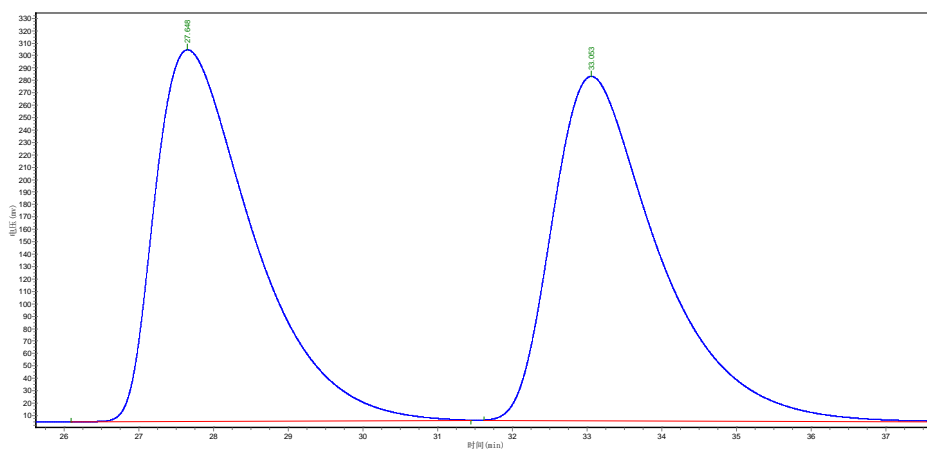

| Peak | Ret Time(min) | Height(mAU) | Area(Mau *s) | Area (%) |
|------|---------------|-------------|--------------|----------|
| 1    | 27.648        | 299298.688  | 27260920.000 | 49.8503  |
| 2    | 33.053        | 277158.094  | 27424672.000 | 50.1497  |

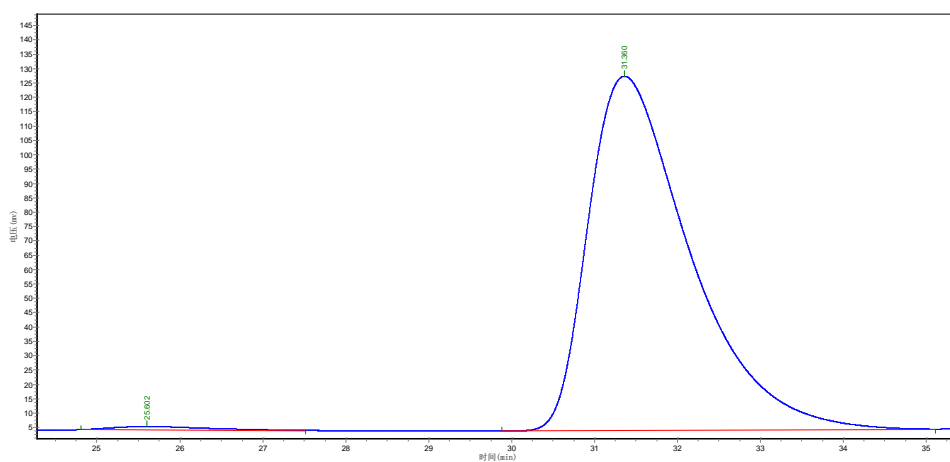

| Peak | Ret Time(min) | Height(mAU) | Area(Mau *s) | Area (%) |
|------|---------------|-------------|--------------|----------|
| 1    | 25.602        | 1194.819    | 95886.930    | 0.9046   |
| 2    | 31.360        | 123377.320  | 10504184.000 | 99.0954  |

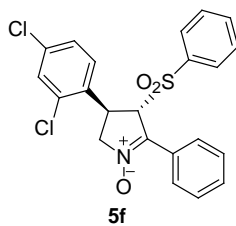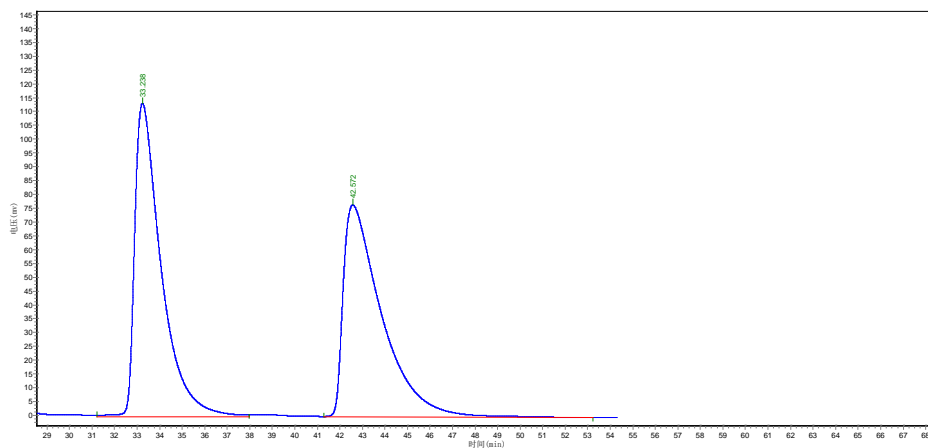

| Peak | Ret Time(min) | Height(mAU) | Area(Mau *s) | Area (%) |
|------|---------------|-------------|--------------|----------|
| 1    | 33.238        | 113421.586  | 9265379.000  | 50.3635  |
| 2    | 42.572        | 76750.023   | 9131631.000  | 49.6365  |

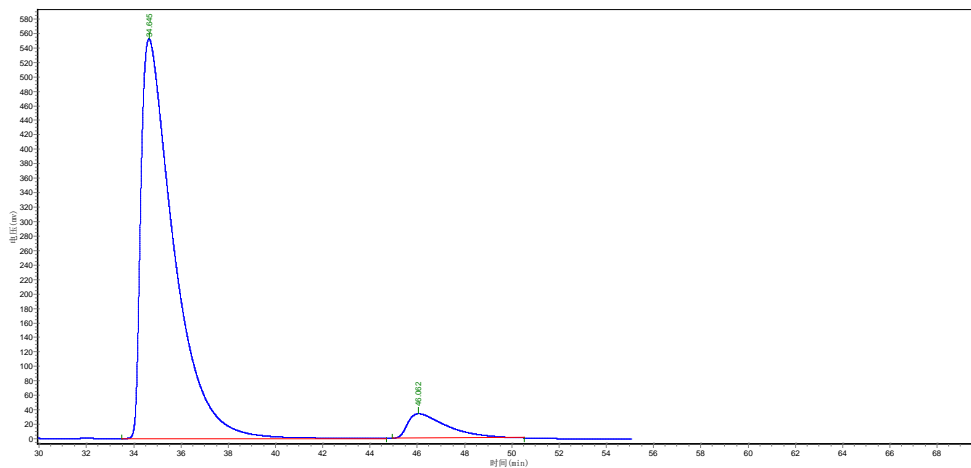

| Peak | Ret Time(min) | Height(mAU) | Area(Mau *s) | Area (%) |
|------|---------------|-------------|--------------|----------|
| 1    | 34.645        | 551484.313  | 52590460.000 | 94.8019  |
| 2    | 46.062        | 30678.080   | 2883607.250  | 5.1981   |

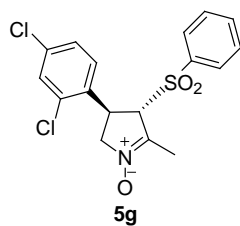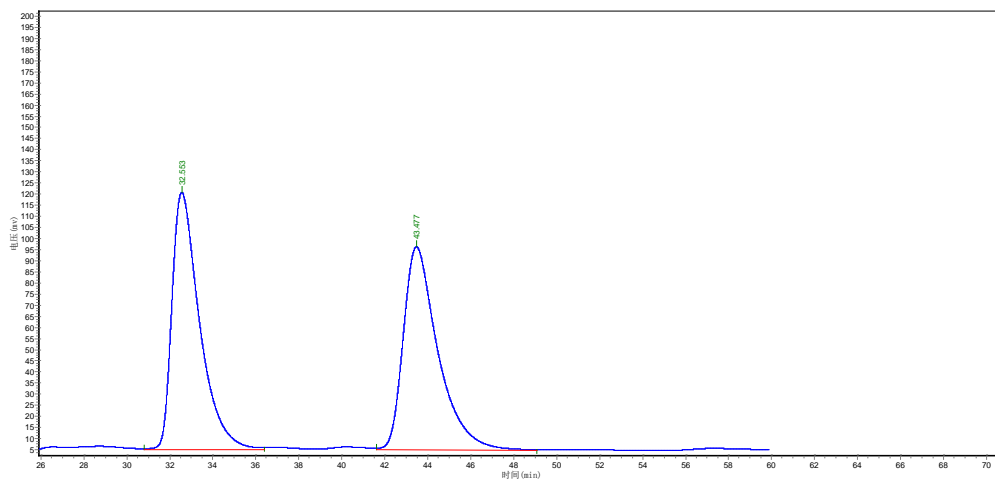

| Peak | Ret Time(min) | Height(mAU) | Area(Mau *s) | Area (%) |
|------|---------------|-------------|--------------|----------|
| 1    | 32.553        | 115767.773  | 10351496.000 | 50.2194  |
| 2    | 43.477        | 91437.758   | 10261030.000 | 49.7806  |

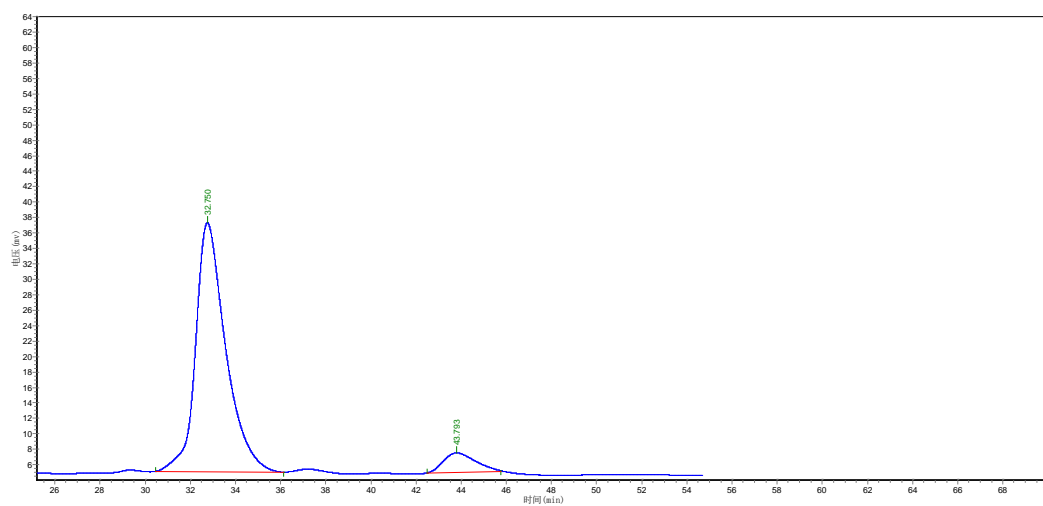

| Peak | Ret Time(min) | Height(mAU) | Area(Mau *s) | Area (%) |
|------|---------------|-------------|--------------|----------|
| 1    | 32.750        | 32217.285   | 2982590.000  | 94.8641  |
| 2    | 43.793        | 2038.825    | 161475.188   | 5.1359   |

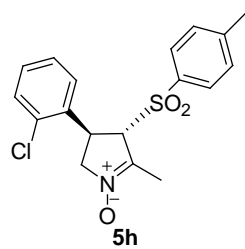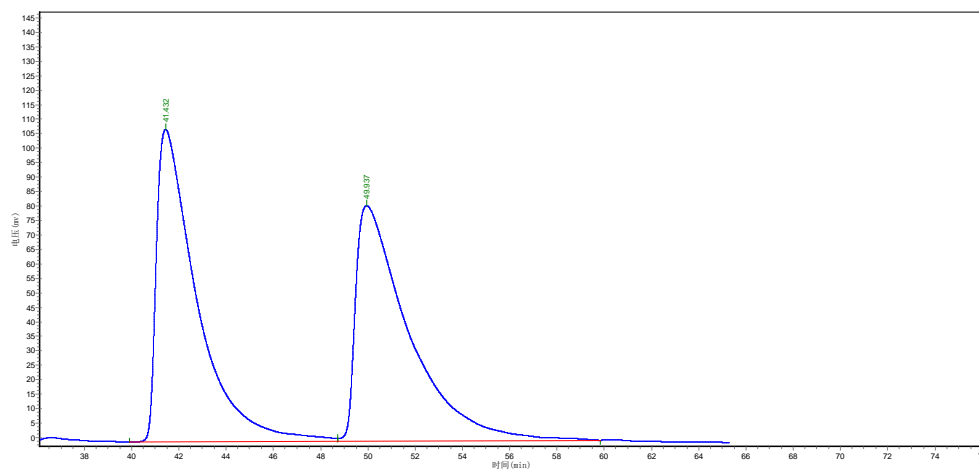

| Peak | Ret Time(min) | Height(mAU) | Area(Mau *s) | Area (%) |
|------|---------------|-------------|--------------|----------|
| 1    | 41.432        | 107997.164  | 12800144.000 | 50.2506  |
| 2    | 49.937        | 81391.125   | 12672484.000 | 49.7494  |

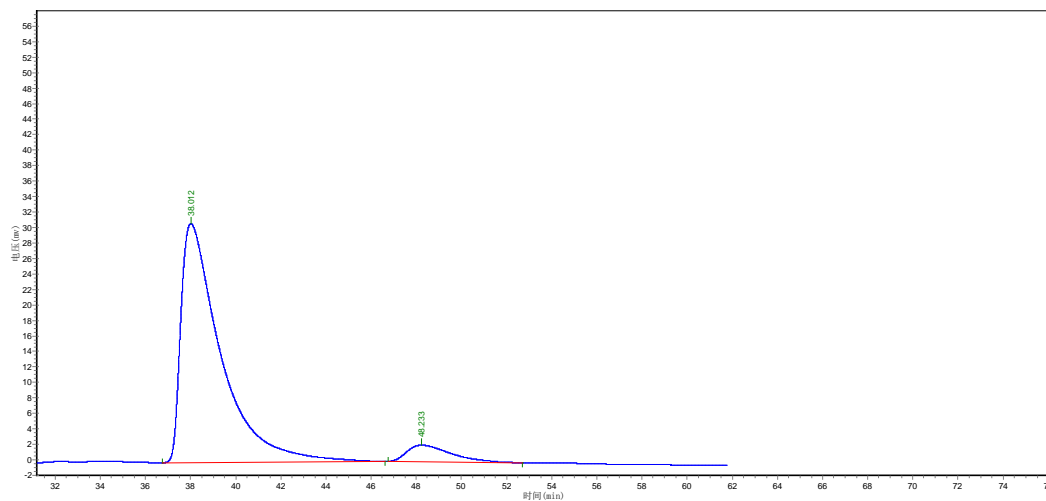

| Peak | Ret Time(min) | Height(mAU) | Area(Mau *s) | Area (%) |
|------|---------------|-------------|--------------|----------|
| 1    | 38.012        | 30881.373   | 3781360.750  | 92.8625  |
| 2    | 48.233        | 2136.664    | 290637.688   | 7.1375   |

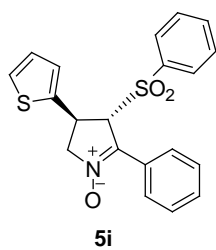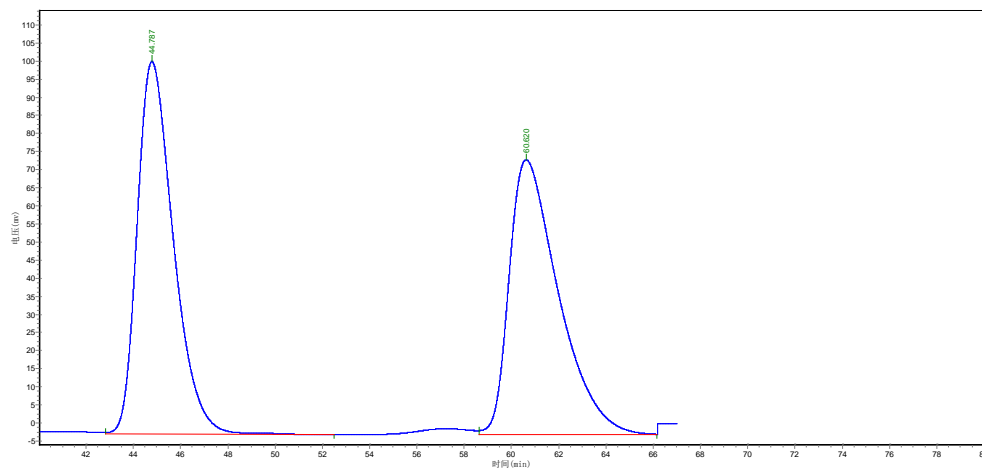

| Peak | Ret Time(min) | Height(mAU) | Area(Mau *s) | Area (%) |
|------|---------------|-------------|--------------|----------|
| 1    | 44.787        | 103018.711  | 11003791.000 | 50.0458  |
| 2    | 60.620        | 75917.359   | 10983661.000 | 49.9542  |

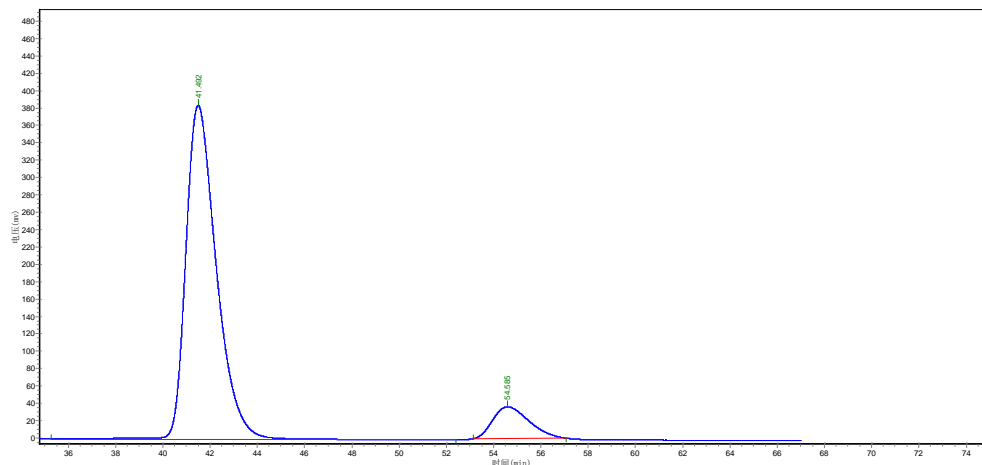

| Peak | Ret Time(min) | Height(mAU) | Area(Mau *s) | Area (%) |
|------|---------------|-------------|--------------|----------|
| 1    | 41.492        | 383147.156  | 33796168.000 | 90.5065  |
| 2    | 54.585        | 35216.727   | 3544997.500  | 9.4935   |

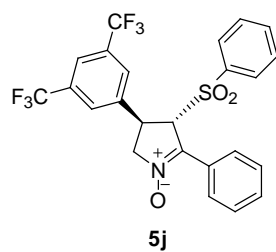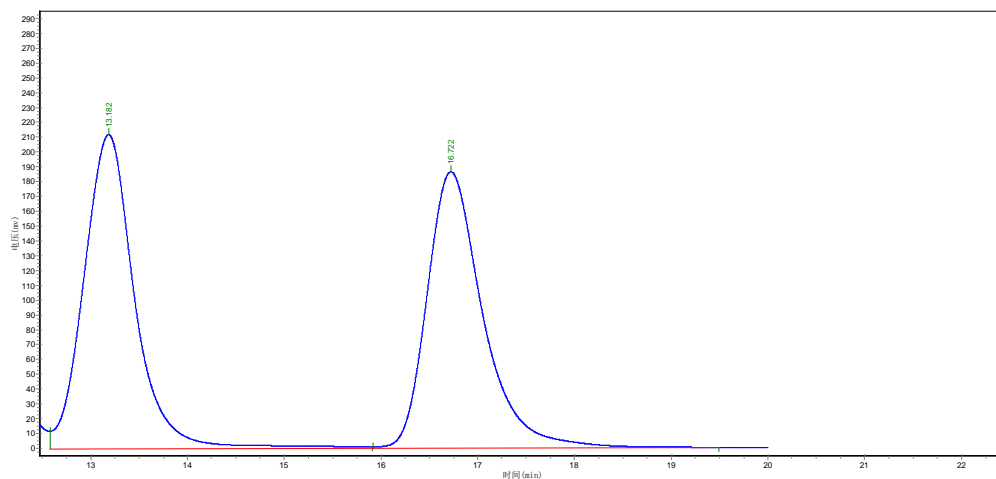

| Peak | Ret Time(min) | Height(mAU) | Area(Mau *s) | Area (%) |
|------|---------------|-------------|--------------|----------|
| 1    | 13.182        | 211972.375  | 7741787.500  | 50.9270  |
| 2    | 16.722        | 186393.906  | 7459942.000  | 49.0730  |

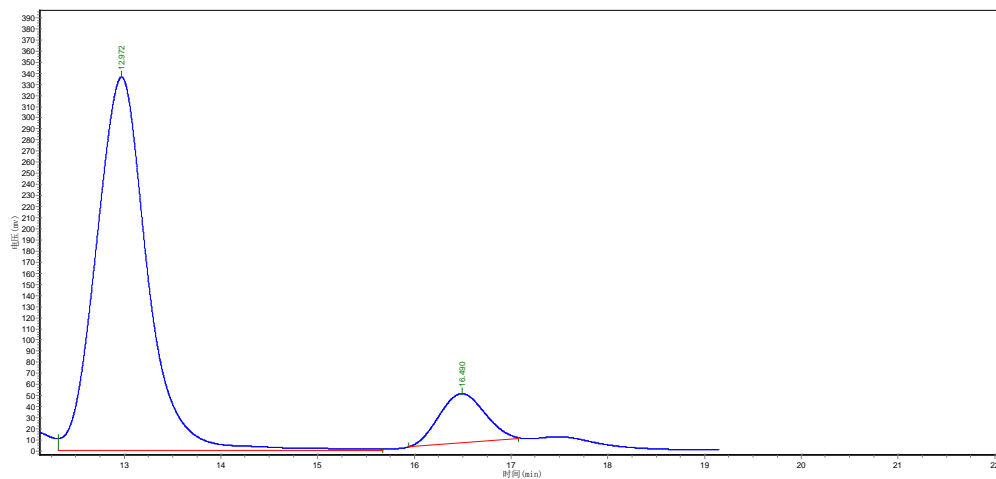

| Peak | Ret Time(min) | Height(mAU) | Area(Mau *s) | Area (%) |
|------|---------------|-------------|--------------|----------|
| 1    | 12.972        | 328887.844  | 11527151.000 | 90.1633  |
| 2    | 16.490        | 41152.746   | 1257601.875  | 9.8367   |



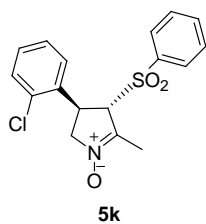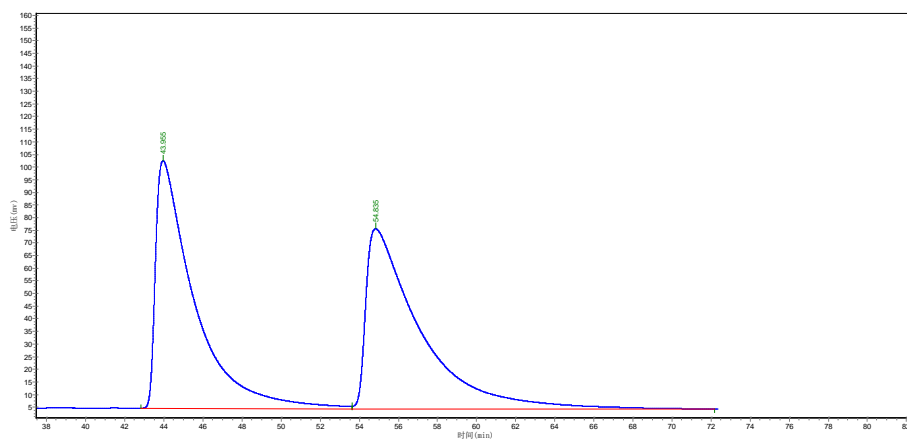

| Peak | Ret Time(min) | Height(mAU) | Area(Mau *s) | Area (%) |
|------|---------------|-------------|--------------|----------|
| 1    | 43.955        | 98033.422   | 13462370.000 | 49.7565  |
| 2    | 54.835        | 71241.734   | 13666193.000 | 50.2435  |

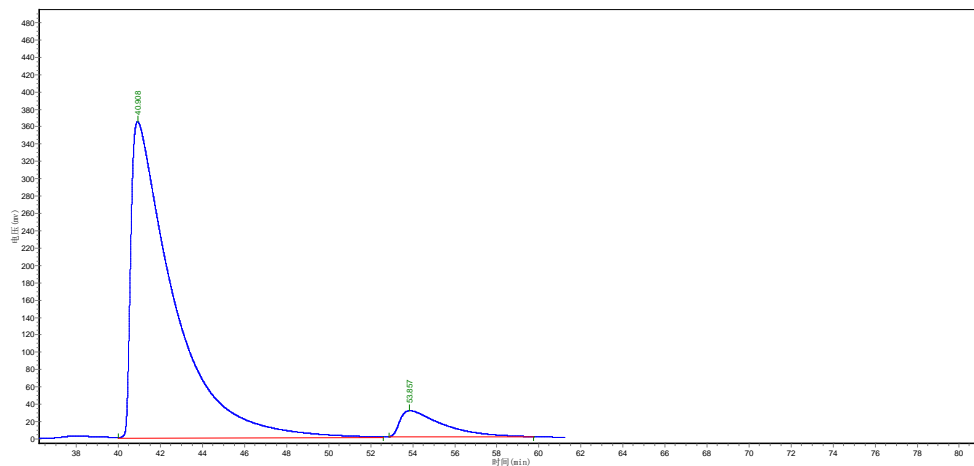

| Peak | Ret Time(min) | Height(mAU) | Area(Mau *s) | Area (%) |
|------|---------------|-------------|--------------|----------|
| 1    | 40.908        | 364717.938  | 51140636.000 | 92.9149  |
| 2    | 53.857        | 29724.738   | 3899658.250  | 7.0851   |

51

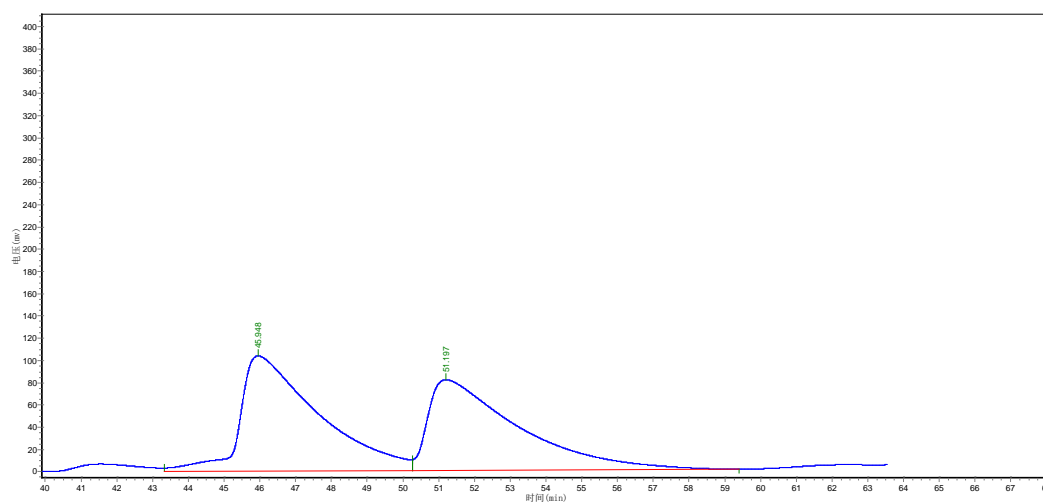

| 峰号 | 峰名     | 保留时间      | 峰高           | 峰面积     | 含量 |
|----|--------|-----------|--------------|---------|----|
| 1  | 45.948 | 81282.797 | 14056010.000 | 51.9012 |    |
| 2  | 51.197 | 97679.172 | 13026248.000 | 48.0988 |    |

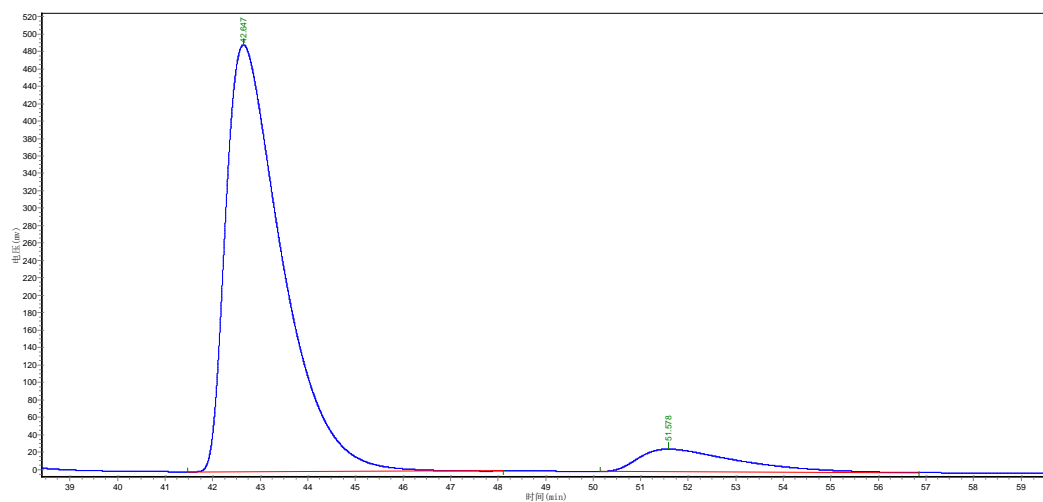

| 峰号 | 峰名     | 保留时间       | 峰高           | 峰面积     | 含量 |
|----|--------|------------|--------------|---------|----|
| 1  | 42.647 | 490181.844 | 40224072.000 | 91.3749 |    |
| 2  | 51.578 | 26030.682  | 3796841.250  | 8.6251  |    |

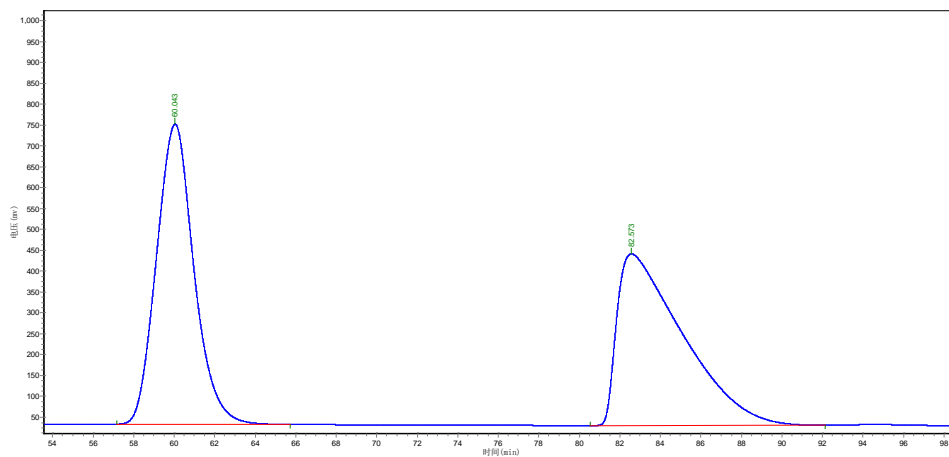

| Peak | Ret Time(min) | Height(mAU) | Area(Mau *s) | Area (%) |
|------|---------------|-------------|--------------|----------|
| 1    | 60.043        | 719453.813  | 92331200.000 | 49.8476  |
| 2    | 82.573        | 411480.594  | 92895832.000 | 50.1524  |

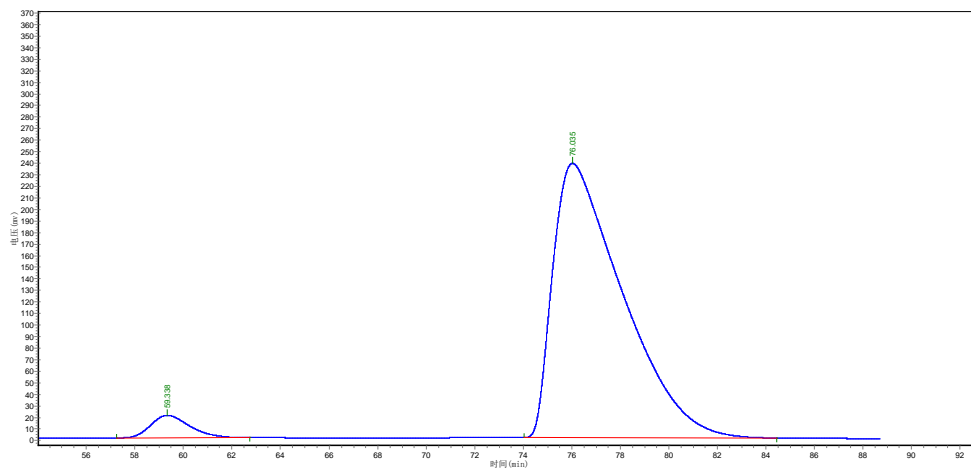

| Peak | Ret Time(min) | Height(mAU) | Area(Mau *s) | Area (%) |
|------|---------------|-------------|--------------|----------|
| 1    | 59.338        | 19430.230   | 2174932.000  | 4.3795   |
| 2    | 76.035        | 237412.047  | 47486332.000 | 95.6205  |
